# Supplementary material for: Mobile Biomonitoring of Atmospheric Pollution: A New Perspective for the Moss-Bag Approach
Source: MDPI journal article supplement (doi:10.3390/plants10112384), 2021-11-05
Supplement: s1 [file s1]

**Table S2.** Mean element concentrations and SD (n=3, mg kg<sup>-1</sup>) measured for each route at the end of experiment; the element content and the standard deviation of the pre-exposed moss is indicated as BL (baseline). BDL: below detection limit.

|           | Ag        | Al        | As        | Be        | Ca        | Cd        | Co        | Cr        | Cu        | Fe        | Hg        | K         | Mg        | Mn        |
|-----------|-----------|-----------|-----------|-----------|-----------|-----------|-----------|-----------|-----------|-----------|-----------|-----------|-----------|-----------|
| <b>BL</b> | 0.04±0.01 | 5817±480  | 0.87±0.03 | 0.46±0.1  | 2096±283  | 0.06±0.01 | 0.82±0.04 | 2.38±0.04 | 13.6±6.02 | 2150±59.4 | 0.11±0.00 | 1848±69.6 | 886±44.9  | 55.6±0.85 |
| <b>U1</b> | 0.03±0.01 | 5213±264  | 0.86±0.06 | 0.2±0.11  | 2283±851  | 0.03±0.02 | 0.54±0.07 | 1.87±0.46 | 11.4±0.42 | 1567±95.5 | 0.09±0.00 | 1984±124  | 841±54    | 42.9±1.89 |
| <b>U2</b> | 0.04±0.01 | 5385±502  | 0.75±0.08 | 0.11±0.06 | 2076±424  | 0.03±0.01 | 0.57±0.07 | 1.73±0.07 | 10.1±0.13 | 1636±134  | 0.08±0.00 | 1855±34.4 | 853±27.3  | 42.8±2.7  |
| <b>U3</b> | 0.04±0.02 | 5617±372  | 0.8±0.03  | 0.22±0.02 | 1875±461  | 0.04±0.02 | 0.66±0.03 | 1.86±0.33 | 10.1±0.38 | 1767±213  | 0.09±0.00 | 1722±49.9 | 799±25.6  | 46.3±5.63 |
| <b>U4</b> | 0.08±0.07 | 5353±686  | 0.8±0.11  | 0.26±0.05 | 2032±283  | 0.04±0.04 | 0.72±0.08 | 2.01±0.21 | 15.3±5.85 | 1814±84.6 | 0.1±0.00  | 2852±1167 | 949±98.1  | 47.1±1.41 |
| <b>U5</b> | 0.06±0.02 | 4773±676  | 0.8±0.15  | 0.18±0.09 | 2282±314  | 0.03±0.00 | 0.64±0.14 | 2.4±0.11  | 21±2.71   | 1849±253  | 0.09±0.01 | 1984±188  | 973±88    | 46.4±4.87 |
| <b>U6</b> | 0.06±0.02 | 5262±585  | 0.82±0.08 | 0.2±0.03  | 1990±158  | 0.04±0.02 | 0.7±0.09  | 2.57±1.1  | 12.6±1.59 | 1900±300  | 0.1±0.00  | 2070±172  | 923±95.4  | 49.6±3.89 |
| <b>U7</b> | 0.04±0.00 | 5132±1412 | 0.94±0.12 | 0.18±0.11 | 2005±211  | 0.04±0.01 | 0.62±0.07 | 1.77±0.26 | 10.4±0.47 | 1746±176  | 0.1±0.01  | 1906±109  | 881±61    | 44.1±2.65 |
| <b>I7</b> | 0.29±0.03 | 6028±1993 | 2.62±0.07 | 0.21±0.08 | 1670±355  | 0.15±0.04 | 0.73±0.23 | 1.47±0.21 | 15.8±1.29 | 1739±463  | 0.11±0.01 | 1838±391  | 858±253   | 42.1±11.1 |
| <b>G7</b> | 0.05±0.02 | 6205±1263 | 1.05±0.07 | 0.18±0.02 | 1786±114  | 0.05±0.00 | 0.7±0.11  | 1.55±0.15 | 9.78±0.26 | 1719±200  | 0.09±0.01 | 1894±37.4 | 895±27.4  | 43.1±4.19 |
| <b>T7</b> | 0.33±0.07 | 5582±551  | 5±0.27    | 0.15±0.00 | 1982±28.3 | 0.35±0.09 | 0.83±0.09 | 1.89±0.07 | 22.8±1.31 | 1921±72.4 | 0.13±0.01 | 1914±140  | 907±37    | 49.7±3.19 |
|           | Mo        | Na        | Ni        | Pd        | Pb        | Rb        | Si        | Sb        | Sr        | Ti        | Tl        | U         | V         | Zn        |
| <b>BL</b> | 0.29±0.06 | 8257±349  | 2.4±0.08  | BDL       | 4.36±0.21 | 6.93±0.44 | 1922±53.8 | 0.27±0.06 | 17.7±0.87 | 23.1±0.56 | 0.18±0.04 | 0.27±0.01 | 7.28±0.28 | 23.7±1.83 |
| <b>U1</b> | 0.32±0.12 | 8690±122  | 2.57±0.3  | BDL       | 4.19±0.42 | 3.24±0.29 | 2722±282  | 1.76±0.63 | 15.5±3.18 | 35±11.10  | 0.17±0.04 | 0.22±0.01 | 4.05±0.87 | 25.7±1.52 |
| <b>U2</b> | 0.2±0.02  | 8456±257  | 2.16±0.14 | BDL       | 3.9±0.2   | 1.86±0.98 | 2701±164  | 0.81±0.11 | 12.9±1.29 | 30.2±2.21 | 0.16±0.00 | 0.22±0.03 | 4.53±0.33 | 24.4±0.64 |
| <b>U3</b> | 0.24±0.02 | 7802±376  | 2.25±0.14 | BDL       | 3.93±0.15 | 2.56±1.09 | 2541±168  | 0.31±0.03 | 12.2±0.92 | 26.9±3.96 | 0.17±0.01 | 0.24±0.00 | 5.1±0.85  | 24.8±3.72 |
| <b>U4</b> | 0.27±0.05 | 9674±1457 | 3.12±1.15 | BDL       | 4.02±0.34 | 3.11±1.34 | 2351±294  | 2.42±0.63 | 11.5±0.85 | 26.2±4.86 | 0.17±0.01 | 0.24±0.00 | 5.33±0.52 | 29.2±4.16 |
| <b>U5</b> | 0.36±0.08 | 8316±705  | 2.76±0.19 | BDL       | 4.34±0.46 | 2.07±0.36 | 2662±139  | 2.33±0.56 | 10.9±1.00 | 31.3±4.37 | 0.16±0.02 | 0.21±0.02 | 4.99±1.47 | 38.4±4.96 |
| <b>U6</b> | 0.31±0.11 | 8832±516  | 3.59±1.93 | BDL       | 4.24±0.32 | 2.61±0.96 | 2254±284  | 2.12±0.13 | 10.7±0.68 | 24.8±1.83 | 0.17±0.00 | 0.23±0.00 | 5.43±1.23 | 29.7±2.78 |
| <b>U7</b> | 0.2±0.04  | 8366±427  | 2.32±0.04 | BDL       | 4.36±0.47 | 1.76±0.77 | 2597±437  | 1.17±0.56 | 10.7±1.04 | 30.1±6.98 | 0.16±0.01 | 0.22±0.02 | 4.15±1.01 | 24±1.86   |
| <b>I7</b> | 0.19±0.03 | 7714±1297 | 4.02±0.37 | BDL       | 15±1.41   | 1.69±1.06 | 2479±484  | 1.54±0.12 | 10.4±2.9  | 28.1±6.37 | 0.17±0.03 | 0.23±0.06 | 4.13±1.05 | 23.8±4.06 |
| <b>G7</b> | 0.21±0.03 | 8127±353  | 2.29±0.19 | BDL       | 4.59±0.17 | 2.48±0.81 | 2646±150  | 0.42±0.09 | 12±1.25   | 27.2±1.64 | 0.18±0.02 | 0.23±0.01 | 4.12±0.57 | 22.3±0.57 |
| <b>T7</b> | 0.27±0.04 | 8141±787  | 6.66±0.28 | BDL       | 21.9±4.57 | 2.01±0.75 | 2676±85.7 | 2.58±0.19 | 13±1.21   | 29.8±3.00 | 0.19±0.01 | 0.25±0.01 | 4.68±0.39 | 31.6±0.92 |
