# Supplementary material for: Mobile Biomonitoring of Atmospheric Pollution: A New Perspective for the Moss-Bag Approach
Source: MDPI journal article supplement (doi:10.3390/plants10112384), 2021-11-05
Supplement: s1 [file s1]

**Table S3.** Daily deposition flux ( $\mu\text{g m}^{-2} \text{d}^{-1}$ ) of accumulated elements along each route. Different letters indicate significant differences according to Tukey's post-hoc test ( $p < 0.05$ )

|           | <b>Ag</b> | <b>As</b> | <b>Cd</b> | <b>Cr</b> | <b>Hg</b> | <b>K</b> | <b>Na</b> | <b>Ni</b> | <b>Pb</b> | <b>Si</b> | <b>Sb</b> | <b>Ti</b> | <b>Zn</b> |
|-----------|-----------|-----------|-----------|-----------|-----------|----------|-----------|-----------|-----------|-----------|-----------|-----------|-----------|
| <b>U1</b> | 0.009e    | 0.194d    | 0         | 0.122b    | 0         | 967c     | 3078b     | 2.351c    | 1.436c    | 5691b     | 10.60b    | 84.62a    | 14.14c    |
| <b>U2</b> | 0.059d    | 0         | 0         | 0         | 0         | 379d     | 2535c     | 0         | 0         | 6297b     | 4.37c     | 57.61b    | 5.15d     |
| <b>U3</b> | 0.190c    | 0         | 0.083d    | 0         | 0         | 0        | 0         | 0         | 0         | 4401c     | 0.40d     | 26.86c    | 38.14b    |
| <b>U4</b> | 0.886b    | 0.798c    | 0.438c    | 0         | 0         | 14278a   | 20154a    | 15.952a   | 0.730c    | 6106b     | 30.65a    | 71.43a    | 77.87a    |
| <b>U5</b> | 0.069d    | 0.084d    | 0         | 0.166b    | 0         | 405d     | 762       | 0.689d    | 0.967c    | 1408d     | 3.92c     | 15.70d    | 27.95b    |
| <b>U6</b> | 0.160c    | 0.333d    | 0.067d    | 11.192a   | 0         | 1732b    | 4489b     | 14.087a   | 1.953c    | 2599d     | 14.46b    | 13.60d    | 46.94b    |
| <b>U7</b> | 0.028e    | 0.937c    | 0         | 0         | 0         | 743c     | 4759b     | 0         | 4.272c    | 5333c     | 7.15b     | 55.00b    | 18.78c    |
| <b>I7</b> | 2.147a    | 14.855a   | 0.727a    | 0         | 0.039b    | 1826b    | 1726c     | 13.707a   | 90.200a   | 7083a     | 10.77b    | 73.45a    | 19.89c    |
| <b>G7</b> | 0.155c    | 1.603c    | 0         | 0         | 0         | 401d     | 1946c     | 0.823d    | 1.963c    | 6296b     | 1.29c     | 35.51c    | 0         |
| <b>T7</b> | 0.635b    | 8.948b    | 0.636b    | 0         | 0.048a    | 304d     | 1432c     | 9.236b    | 38.007b   | 1636d     | 5.02c     | 14.65d    | 17.13c    |
