# Supplementary material for: Mobile Biomonitoring of Atmospheric Pollution: A New Perspective for the Moss-Bag Approach
Source: MDPI journal article supplement (doi:10.3390/plants10112384), 2021-11-05
Supplement: s1 [file s1]

**Table S1.** Mean element content (mg kg<sup>-1</sup> DW) in pre-exposed moss (BL) and standard deviation (SD); LOQT (limit of quantification of the technique; see the text for details); element content in each exposed moss sample. Concentrations higher than LOQT are marked in light pink. All element concentrations and LOQT are expressed as mg kg<sub>1</sub> DW.

|          | Ag    | Al   | As    | Ca   | Cd    | Co    | Cr    | Hg    | K    | Mg   | Mo    | Na    | Ni   | Pb    | Si   | Sb    | Ti   | Zn   |
|----------|-------|------|-------|------|-------|-------|-------|-------|------|------|-------|-------|------|-------|------|-------|------|------|
| mean     |       |      |       |      |       |       |       |       |      |      |       |       |      |       |      |       |      |      |
| BL (n=4) | 0.045 | 5817 | 0.873 | 2097 | 0.065 | 0.823 | 2.380 | 0.117 | 1849 | 887  | 0.293 | 8258  | 2.40 | 4.37  | 1922 | 0.275 | 23.1 | 23.8 |
| SD       | 0.015 | 481  | 0.037 | 284  | 0.015 | 0.043 | 0.048 | 0.005 | 70   | 45   | 0.065 | 349   | 0.09 | 0.21  | 54   | 0.067 | 0.6  | 1.8  |
| LOQT     | 0.076 | 6779 | 0.948 | 2665 | 0.096 | 0.909 | 2.477 | 0.127 | 1988 | 977  | 0.423 | 8956  | 2.58 | 4.80  | 2030 | 0.408 | 24.3 | 27.5 |
| U1       | 0.047 | 5422 | 0.790 | 1783 | 0.043 | 0.605 | 2.397 | 0.087 | 1994 | 809  | 0.446 | 8790  | 2.86 | 4.57  | 2575 | 1.603 | 30.2 | 25.7 |
| U1       | 0.034 | 5303 | 0.918 | 3267 | 0.057 | 0.458 | 1.495 | 0.100 | 2104 | 904  | 0.342 | 8729  | 2.60 | 4.27  | 3049 | 2.465 | 47.8 | 27.3 |
| U1       | 0.023 | 4915 | 0.884 | 1800 | 0.011 | 0.571 | 1.727 | 0.087 | 1856 | 812  | 0.193 | 8553  | 2.26 | 3.74  | 2544 | 1.228 | 27.1 | 24.3 |
| U2       | 0.053 | 4855 | 0.661 | 1838 | 0.021 | 0.500 | 1.649 | 0.086 | 1836 | 829  | 0.187 | 8736  | 2.10 | 3.71  | 2532 | 0.887 | 30.4 | 23.8 |
| U2       | 0.030 | 5445 | 0.787 | 2567 | 0.027 | 0.581 | 1.765 | 0.084 | 1896 | 883  | 0.200 | 8407  | 2.06 | 3.89  | 2861 | 0.874 | 32.4 | 24.3 |
| U2       | 0.042 | 5855 | 0.829 | 1826 | 0.048 | 0.656 | 1.799 | 0.097 | 1836 | 848  | 0.229 | 8228  | 2.33 | 4.12  | 2712 | 0.687 | 28.0 | 25.1 |
| U3       | 0.038 | 5988 | 0.816 | 1564 | 0.077 | 0.671 | 2.150 | 0.104 | 1664 | 771  | 0.274 | 7519  | 2.38 | 3.95  | 2515 | 0.333 | 25.1 | 29.2 |
| U3       | 0.072 | 5622 | 0.836 | 2405 | 0.035 | 0.618 | 1.494 | 0.092 | 1748 | 810  | 0.226 | 7659  | 2.10 | 4.09  | 2721 | 0.330 | 31.5 | 22.9 |
| U3       | 0.032 | 5243 | 0.766 | 1656 | 0.023 | 0.695 | 1.952 | 0.101 | 1753 | 819  | 0.228 | 8230  | 2.28 | 3.78  | 2387 | 0.271 | 24.2 | 22.5 |
| U4       | 0.170 | 5221 | 0.930 | 2328 | 0.096 | 0.817 | 2.251 | 0.115 | 4174 | 1037 | 0.327 | 11329 | 4.46 | 4.42  | 2213 | 2.593 | 24.5 | 34.0 |
| U4       | 0.046 | 4744 | 0.731 | 2008 | 0.013 | 0.680 | 1.826 | 0.099 | 2422 | 969  | 0.266 | 9118  | 2.59 | 3.78  | 2690 | 2.967 | 31.8 | 27.8 |
| U4       | 0.034 | 6097 | 0.740 | 1762 | 0.032 | 0.667 | 1.967 | 0.100 | 1962 | 844  | 0.227 | 8578  | 2.33 | 3.87  | 2152 | 1.730 | 22.6 | 26.1 |
| U5       | 0.086 | 4739 | 0.918 | 2509 | 0.020 | 0.728 | 2.497 | 0.095 | 2194 | 1074 | 0.457 | 9041  | 2.62 | 4.88  | 2691 | 2.978 | 31.0 | 40.6 |
| U5       | 0.078 | 4115 | 0.629 | 2416 | 0.039 | 0.487 | 2.438 | 0.081 | 1829 | 938  | 0.360 | 7632  | 2.98 | 4.06  | 2785 | 2.076 | 35.9 | 42.0 |
| U5       | 0.044 | 5466 | 0.869 | 1924 | 0.033 | 0.731 | 2.272 | 0.101 | 1930 | 909  | 0.282 | 8276  | 2.69 | 4.09  | 2511 | 1.948 | 27.2 | 32.8 |
| U6       | 0.094 | 5922 | 0.916 | 2165 | 0.044 | 0.815 | 3.812 | 0.114 | 2268 | 1026 | 0.448 | 9425  | 5.82 | 4.62  | 2029 | 1.968 | 23.5 | 33.0 |
| U6       | 0.049 | 4803 | 0.779 | 1853 | 0.074 | 0.644 | 1.713 | 0.101 | 1991 | 838  | 0.267 | 8474  | 2.37 | 4.07  | 2349 | 2.179 | 24.2 | 28.4 |
| U6       | 0.054 | 5064 | 0.773 | 1954 | 0.026 | 0.645 | 2.192 | 0.099 | 1952 | 905  | 0.229 | 8598  | 2.59 | 4.04  | 2480 | 2.228 | 27.0 | 28.0 |
| U7       | 0.036 | 4582 | 1.088 | 2054 | 0.042 | 0.577 | 1.708 | 0.091 | 1834 | 859  | 0.173 | 8099  | 2.29 | 4.91  | 3091 | 1.734 | 38.1 | 26.2 |
| U7       | 0.047 | 4077 | 0.896 | 1773 | 0.036 | 0.598 | 1.542 | 0.101 | 1854 | 836  | 0.198 | 8141  | 2.31 | 4.10  | 2445 | 1.190 | 26.7 | 23.1 |
| U7       | 0.051 | 6737 | 0.860 | 2189 | 0.057 | 0.713 | 2.067 | 0.113 | 2032 | 951  | 0.252 | 8860  | 2.37 | 4.08  | 2256 | 0.614 | 25.5 | 22.8 |
| I7       | 0.334 | 4102 | 2.619 | 1260 | 0.199 | 0.468 | 1.226 | 0.094 | 1386 | 565  | 0.156 | 6220  | 3.61 | 14.46 | 1921 | 1.666 | 20.8 | 19.1 |
| I7       | 0.277 | 5901 | 2.710 | 1883 | 0.113 | 0.821 | 1.597 | 0.126 | 2062 | 1007 | 0.225 | 8556  | 4.36 | 16.63 | 2727 | 1.565 | 32.5 | 26.4 |
| I7       | 0.287 | 8082 | 2.555 | 1867 | 0.141 | 0.916 | 1.592 | 0.118 | 2067 | 1003 | 0.217 | 8367  | 4.09 | 13.98 | 2791 | 1.410 | 31.1 | 25.8 |
| G7       | 0.042 | 7126 | 1.075 | 1907 | 0.060 | 0.821 | 1.658 | 0.112 | 1933 | 912  | 0.253 | 7774  | 2.50 | 4.69  | 2477 | 0.533 | 26.5 | 23.0 |
| G7       | 0.081 | 6725 | 1.122 | 1774 | 0.047 | 0.701 | 1.630 | 0.091 | 1894 | 911  | 0.207 | 8127  | 2.26 | 4.70  | 2762 | 0.386 | 29.1 | 22.1 |
| G7       | 0.046 | 4765 | 0.977 | 1679 | 0.061 | 0.601 | 1.376 | 0.096 | 1858 | 864  | 0.184 | 8482  | 2.12 | 4.40  | 2700 | 0.352 | 26.1 | 21.9 |
| T7       | 0.431 | 5385 | 5.285 | 2012 | 0.464 | 0.855 | 1.940 | 0.151 | 1931 | 909  | 0.296 | 8163  | 6.62 | 27.15 | 2579 | 2.792 | 27.6 | 32.6 |
| T7       | 0.296 | 6205 | 4.974 | 1980 | 0.294 | 0.919 | 1.933 | 0.139 | 1767 | 869  | 0.305 | 7344  | 6.97 | 19.75 | 2715 | 2.580 | 28.8 | 30.7 |
| T7       | 0.289 | 5156 | 4.743 | 1956 | 0.317 | 0.731 | 1.810 | 0.128 | 2047 | 943  | 0.230 | 8918  | 6.40 | 18.80 | 2737 | 2.395 | 33.3 | 31.8 |
