# Supplementary material for: Mobile Biomonitoring of Atmospheric Pollution: A New Perspective for the Moss-Bag Approach
Source: MDPI journal article supplement (doi:10.3390/plants10112384), 2021-11-05
Supplement: s1 [file s1]

**Table S4.** For each route travelled by the six volunteers (U1 to U6), the total distance travelled (km) with moss exposed on their bikes, the total exposure time (h) of the moss bags, and the average speed (km/h).

|           | Route (km) | Exposure time<br>(h) | Average speed<br>(km/h) |
|-----------|------------|----------------------|-------------------------|
| <b>U1</b> | 300        | 25                   | 12                      |
| <b>U2</b> | 297        | 22                   | 13.5                    |
| <b>U3</b> | 310        | 25                   | 12.4                    |
| <b>U4</b> | 180        | 13                   | 13.8                    |
| <b>U5</b> | 1700       | 93                   | 18.3                    |
| <b>U6</b> | 340        | 22                   | 15.4                    |
| <b>U7</b> | 352        | 22                   | 16                      |
| <b>I7</b> | 330        | 21                   | 15.7                    |
| <b>G7</b> | 308        | 20                   | 15.4                    |
| <b>T7</b> | 1100       | 82                   | 13.4                    |
